# Supplementary material
Source: PubMed Central journal article supplement (PMC4931728)
Supplement: Supp_Table1.pdf [file Supp_Table1.pdf]

## Supplementary Data

SUPPLEMENTARY TABLE 1. LIST OF GENES SIGNIFICANTLY CHANGED IN MOUSE TBI VASCULOME

| <i>Probe_ID</i> | <i>Gene ID</i> | <i>Symbol</i> | <i>Ipsi vs. Norm</i> |             | <i>Ipsi vs. Cont</i> |             | <i>Description</i>                                             |
|-----------------|----------------|---------------|----------------------|-------------|----------------------|-------------|----------------------------------------------------------------|
|                 |                |               | <i>p value</i>       | <i>Fold</i> | <i>p value</i>       | <i>Fold</i> |                                                                |
| 1456084_x_at    | 14264          | Fmod          | 0.003                | 0.082       | 0.004                | 0.072       | Fibromodulin                                                   |
| 1450468_at      | 17926          | Myoc          | 0.003                | 0.092       | 0.004                | 0.109       | Myocilin                                                       |
| 1419663_at      | 18295          | Ogn           | 0.007                | 0.163       | 0.010                | 0.164       | Osteoglycin                                                    |
| 1418979_at      | 105387         | Akr1c14       | 0.003                | 0.165       | 0.001                | 0.149       | Aldo-keto reductase family 1, member C14                       |
| 1437685_x_at    | 14264          | Fmod          | 0.001                | 0.182       | 0.001                | 0.163       | Fibromodulin                                                   |
| 1437718_x_at    | 14264          | Fmod          | 0.002                | 0.186       | 0.002                | 0.170       | Fibromodulin                                                   |
| 1415939_at      | 14264          | Fmod          | 0.001                | 0.187       | 0.001                | 0.151       | Fibromodulin                                                   |
| 1437324_x_at    | 14264          | Fmod          | 0.003                | 0.210       | 0.003                | 0.176       | Fibromodulin                                                   |
| 1419662_at      | 18295          | Ogn           | 0.001                | 0.212       | 0.002                | 0.220       | Osteoglycin                                                    |
| 1434734_at      | 623474         | E130016E03Rik | 0.003                | 0.215       | 0.001                | 0.272       | RIKEN cDNA E130016E03 gene                                     |
| 1451006_at      | 22436          | Xdh           | 0.003                | 0.238       | 0.002                | 0.238       | Xanthine dehydrogenase                                         |
| 1423858_a_at    | 15360          | Hmgcs2        | 0.000                | 0.247       | 0.000                | 0.290       | 3-Hydroxy-3-methylglutaryl-coenzyme A synthase 2               |
| 1416966_at      | 19879          | Slc22a8       | 0.004                | 0.253       | 0.001                | 0.198       | Solute carrier family 22 (organic anion transporter), member 8 |
| 1417574_at      | 20315          | Cxcl12        | 0.000                | 0.254       | 0.000                | 0.239       | Chemokine (C-X-C motif) ligand 12                              |
| 1451322_at      | 69574          | Cmb1          | 0.005                | 0.256       | 0.002                | 0.205       | Carboxymethylglutaminase-like ( <i>Pseudomonas</i> )           |
| 1415989_at      | 22329          | Vcam1         | 0.001                | 0.261       | 0.001                | 0.385       | Vascular cell adhesion molecule 1                              |
| 1427345_a_at    | 20887          | Sult1a1       | 0.001                | 0.262       | 0.000                | 0.182       | Sulfotransferase family 1A, phenol-preferring, member 1        |
| 1426215_at      | 13195          | Ddc           | 0.001                | 0.265       | 0.000                | 0.174       | Dopa decarboxylase                                             |
| 1450699_at      | 20341          | Selenbp1      | 0.001                | 0.265       | 0.001                | 0.227       | Selenium binding protein 1                                     |
| 1438696_at      | 13616          | Edn3          | 0.001                | 0.267       | 0.000                | 0.262       | Endothelin 3                                                   |
| 1457867_at      | 433323         | Sgpp2         | 0.000                | 0.269       | 0.000                | 0.264       | Sphingosine-1-phosphate phosphatase 2                          |
| 1448162_at      | 22329          | Vcam1         | 0.001                | 0.276       | 0.001                | 0.451       | Vascular cell adhesion molecule 1                              |
| 1431833_a_at    | 15360          | Hmgcs2        | 0.002                | 0.281       | 0.001                | 0.352       | 3-Hydroxy-3-methylglutaryl-coenzyme A synthase 2               |
| 1444139_at      | 73284          | Ddit4l        | 0.000                | 0.284       | 0.001                | 0.346       | DNA-damage-inducible transcript 4-like                         |
| 1435418_at      | 19879          | Slc22a8       | 0.005                | 0.284       | 0.000                | 0.180       | Solute carrier family 22 (organic anion transporter), member 8 |
| 1422804_at      | 20708          | Serpinb6b     | 0.004                | 0.288       | 0.003                | 0.293       | Serine (or cysteine) peptidase inhibitor, clade B, member 6b   |
| 1451047_at      | 16431          | Itm2a         | 0.001                | 0.290       | 0.000                | 0.246       | Integral membrane protein 2A                                   |
| 1439790_at      | 20723          | Serpinb9      | 0.005                | 0.291       | 0.003                | 0.292       | Serine (or cysteine) peptidase inhibitor, clade B, member 9    |
| 1440096_at      | 407800         | Ecm2          | 0.002                | 0.292       | 0.002                | 0.363       | Extracellular matrix protein 2                                 |
| 1416321_s_at    | 116847         | Prep          | 0.004                | 0.294       | 0.004                | 0.258       | Proline arginine-rich end leucine-rich repeat                  |
| 1429348_at      | 20348          | Sema3c        | 0.000                | 0.295       | 0.001                | 0.298       | Semaphorin 3C                                                  |
| 1417273_at      | 27273          | Pdk4          | 0.001                | 0.297       | 0.003                | 0.485       | Pyruvate dehydrogenase kinase, isoenzyme 4                     |
| 1456532_at      | 71785          | Pdgfd         | 0.005                | 0.299       | 0.005                | 0.271       | Platelet-derived growth factor, D polypeptide                  |
| 1449980_a_at    | 14403          | Gabrd         | 0.001                | 0.302       | 0.005                | 0.355       | Gamma-aminobutyric acid (GABA-A) receptor, subunit delta       |
| 1426413_at      | 18012          | Neurod1       | 0.000                | 0.304       | 0.000                | 0.449       | Neurogenic differentiation 1                                   |
| 1436417_at      | 80721          | Slc19a3       | 0.003                | 0.305       | 0.001                | 0.270       | Solute carrier family 19, member 3                             |
| 1417963_at      | 18830          | Pltp          | 0.001                | 0.305       | 0.000                | 0.294       | Phospholipid transfer protein                                  |
| 1440879_at      | 217262         | Abca9         | 0.001                | 0.307       | 0.001                | 0.302       | ATP-binding cassette, subfamily A (ABC1), member 9             |
| 1423413_at      | 17988          | Ndrp1         | 0.001                | 0.310       | 0.002                | 0.327       | N-myc downstream-regulated gene 1                              |

(continued)

SUPPLEMENTARY TABLE 1. (CONTINUED)

| Probe_ID     | Gene ID | Symbol        | <i>Ipsi vs. Norm</i> |       | <i>Ipsi vs. Cont</i> |       | Description                                                  |
|--------------|---------|---------------|----------------------|-------|----------------------|-------|--------------------------------------------------------------|
|              |         |               | p value              | Fold  | p value              | Fold  |                                                              |
| 1449009_at   | 21822   | Tgtp          | 0.010                | 0.313 | 0.004                | 0.374 | T-cell-specific GTPase                                       |
| 1417580_s_at | 20342   | Selenbp2      | 0.002                | 0.314 | 0.001                | 0.262 | Selenium-binding protein 2                                   |
| 1441369_at   | 77524   | C030017B01Rik | 0.001                | 0.320 | 0.006                | 0.500 | RIKEN cDNA C030017B01 gene                                   |
| 1436755_at   | 209378  | Itih5         | 0.001                | 0.324 | 0.000                | 0.222 | Inter-alpha (globulin) inhibitor H5                          |
| 1416468_at   | 11668   | Aldh1a1       | 0.003                | 0.324 | 0.001                | 0.258 | Aldehyde dehydrogenase family 1, subfamily A1                |
| 1424701_at   | 219257  | Pcdh20        | 0.001                | 0.328 | 0.001                | 0.479 | Protocadherin 20                                             |
| 1438966_x_at | 14264   | Fmod          | 0.008                | 0.329 | 0.008                | 0.302 | Fibromodulin                                                 |
| 1423611_at   | 11647   | Alpl          | 0.008                | 0.329 | 0.000                | 0.321 | Alkaline phosphatase, liver/bone/kidney                      |
| 1443832_s_at | 20324   | Sdpr          | 0.002                | 0.332 | 0.001                | 0.301 | Serum deprivation response                                   |
| 1434628_a_at | 52428   | Rhpn2         | 0.001                | 0.333 | 0.001                | 0.299 | Rhopilin, Rho GTPase-binding protein 2                       |
| 1416778_at   | 20324   | Sdpr          | 0.004                | 0.333 | 0.001                | 0.320 | Serum deprivation response                                   |
| 1429159_at   | 209378  | Itih5         | 0.004                | 0.335 | 0.001                | 0.257 | Inter-alpha (globulin) inhibitor H5                          |
| 1439332_at   | 73284   | Ddit4l        | 0.001                | 0.336 | 0.001                | 0.374 | DNA-damage-inducible transcript 4-like                       |
| 1456833_at   | 574402  | Gpr17         | 0.001                | 0.340 | 0.000                | 0.375 | G-protein-coupled receptor 17                                |
| 1434052_at   | 330941  | AI593442      | 0.002                | 0.340 | 0.008                | 0.435 | Expressed sequence AI593442                                  |
| 1434354_at   | 109731  | Maob          | 0.004                | 0.341 | 0.000                | 0.289 | Monoamine oxidase B                                          |
| 1441946_at   | 209378  | Itih5         | 0.007                | 0.342 | 0.002                | 0.236 | Inter-alpha (globulin) inhibitor H5                          |
| 1419700_a_at | 19126   | Prom1         | 0.002                | 0.342 | 0.000                | 0.269 | Prominin 1                                                   |
| 1436098_at   | 12038   | Bche          | 0.006                | 0.342 | 0.000                | 0.278 | Butyrylcholinesterase                                        |
| 1434151_at   | 70152   | Mettl7a1      | 0.000                | 0.342 | 0.001                | 0.404 | Methyltransferase-like 7A1                                   |
| 1448823_at   | 20315   | Cxcl12        | 0.005                | 0.344 | 0.005                | 0.333 | Chemokine (C-X-C motif) ligand 12                            |
| 1447272_s_at | 11982   | Atp10a        | 0.004                | 0.344 | 0.002                | 0.278 | ATPase, class V, type 10A                                    |
| 1430600_at   | 67272   | Cmtm5         | 0.003                | 0.344 | 0.009                | 0.466 | CKLF-like MARVEL transmembrane domain-containing 5           |
| 1431805_a_at | 52428   | Rhpn2         | 0.002                | 0.344 | 0.001                | 0.299 | Rhopilin, Rho GTPase-binding protein 2                       |
| 1455225_at   | 64009   | Syne1         | 0.001                | 0.345 | 0.003                | 0.481 | Synaptic nuclear envelope 1                                  |
| 1426575_at   | 208449  | Sgms1         | 0.001                | 0.346 | 0.001                | 0.317 | Sphingomyelin synthase 1                                     |
| 1418907_at   | 14067   | F5            | 0.004                | 0.346 | 0.001                | 0.286 | Coagulation factor V                                         |
| 1452013_at   | 11982   | Atp10a        | 0.003                | 0.347 | 0.003                | 0.291 | ATPase, class V, type 10A                                    |
| 1441923_s_at | 13616   | Edn3          | 0.001                | 0.349 | 0.002                | 0.338 | Endothelin 3                                                 |
| 1421321_a_at | 56349   | Net1          | 0.002                | 0.350 | 0.001                | 0.254 | Neuroepithelial cell transforming gene 1                     |
| 1422438_at   | 13849   | Ephx1         | 0.002                | 0.354 | 0.000                | 0.300 | Epoxide hydrolase 1, microsomal                              |
| 1441214_at   | 320051  | Exph5         | 0.003                | 0.354 | 0.005                | 0.460 | Exophilin 5                                                  |
| 1418094_s_at | 12351   | Car4          | 0.004                | 0.356 | 0.000                | 0.285 | Carbonic anhydrase 4                                         |
| 1448949_at   | 12351   | Car4          | 0.003                | 0.356 | 0.000                | 0.284 | Carbonic anhydrase 4                                         |
| 1416926_at   | 60599   | Trp53inp1     | 0.000                | 0.356 | 0.000                | 0.383 | Transformation-related protein 5-inducible nuclear protein 1 |
| 1423352_at   | 83691   | Crispld1      | 0.001                | 0.360 | 0.001                | 0.339 | Cysteine-rich secretory protein LCCL domain-containing 1     |
| 1416779_at   | 20324   | Sdpr          | 0.005                | 0.360 | 0.002                | 0.331 | Serum deprivation response                                   |
| 1434150_a_at | 70152   | Mettl7a1      | 0.001                | 0.363 | 0.002                | 0.469 | Methyltransferase-like 7A1                                   |
| 1453771_at   | 70676   | Gulp1         | 0.003                | 0.366 | 0.001                | 0.322 | GULP, engulfment adaptor PTB domain-containing 1             |
| 1447851_x_at | 11982   | Atp10a        | 0.009                | 0.366 | 0.006                | 0.307 | ATPase, class V, type 10A                                    |
| 1431724_a_at | 70839   | P2ry12        | 0.001                | 0.369 | 0.001                | 0.363 | Purinergic receptor P2Y, G-protein-coupled 12                |
| 1456152_at   | 74090   | Paqr5         | 0.005                | 0.371 | 0.001                | 0.290 | Progesterin and adipoQ receptor family member V              |
| 1416658_at   | 20378   | Frzb          | 0.000                | 0.372 | 0.000                | 0.461 | Frizzled-related protein                                     |
| 1450928_at   | 15904   | Id4           | 0.000                | 0.375 | 0.001                | 0.424 | Inhibitor of DNA binding 4                                   |
| 1423259_at   | 15904   | Id4           | 0.001                | 0.376 | 0.002                | 0.439 | Inhibitor of DNA binding 4                                   |
| 1443252_at   | 218215  | Rnf144b       | 0.000                | 0.376 | 0.000                | 0.471 | Ring finger protein 144B                                     |
| 1440870_at   | 70673   | Prdm16        | 0.002                | 0.376 | 0.000                | 0.342 | PR domain-containing 16                                      |
| 1417793_at   | 54396   | Iigp2         | 0.003                | 0.379 | 0.002                | 0.405 | Interferon-inducible GTPase 2                                |
| 1420405_at   | 28250   | Slco1a4       | 0.004                | 0.380 | 0.001                | 0.286 | Solute carrier organic anion transporter family, member 1a4  |

(continued)

SUPPLEMENTARY TABLE 1. (CONTINUED)

| Probe_ID     | Gene ID | Symbol     | <i>Ipsi vs. Norm</i> |       | <i>Ipsi vs. Cont</i> |       | Description                                                                                                   |
|--------------|---------|------------|----------------------|-------|----------------------|-------|---------------------------------------------------------------------------------------------------------------|
|              |         |            | p value              | Fold  | p value              | Fold  |                                                                                                               |
| 1422905_s_at | 55990   | Fmo2       | 0.009                | 0.381 | 0.007                | 0.372 | Flavin-containing monooxygenase 2                                                                             |
| 1448566_at   | 53945   | Slc40a1    | 0.010                | 0.383 | 0.001                | 0.276 | Solute carrier family 40 (iron-regulated transporter), member 1                                               |
| 1450976_at   | 17988   | Ndrp1      | 0.002                | 0.386 | 0.001                | 0.383 | N-myc downstream-regulated gene 1                                                                             |
| 1451454_at   | 219257  | Pcdh20     | 0.001                | 0.389 | 0.000                | 0.467 | Protocadherin 20                                                                                              |
| 1444656_at   | 216976  | BC030499   | 0.001                | 0.392 | 0.003                | 0.380 | cDNA sequence BC030499                                                                                        |
| 1417680_at   | 16493   | Kcna5      | 0.000                | 0.393 | 0.000                | 0.390 | Potassium voltage-gated channel, member 5                                                                     |
| 1420760_s_at | 17988   | Ndrp1      | 0.002                | 0.394 | 0.001                | 0.405 | N-myc downstream-regulated gene 1                                                                             |
| 1425281_a_at | 14605   | Tsc22d3    | 0.001                | 0.395 | 0.001                | 0.392 | TSC22 domain family, member 3                                                                                 |
| 1456174_x_at | 17988   | Ndrp1      | 0.002                | 0.397 | 0.002                | 0.428 | N-myc downstream-regulated gene 1                                                                             |
| 1436499_at   | 208449  | Sgms1      | 0.003                | 0.397 | 0.003                | 0.381 | Sphingomyelin synthase 1                                                                                      |
| 1434736_at   | 217082  | Hlf        | 0.001                | 0.398 | 0.001                | 0.356 | Hepatic leukemia factor                                                                                       |
| 1454858_x_at | 70152   | Mettl7a1   | 0.000                | 0.398 | 0.000                | 0.456 | Methyltransferase-like 7A1                                                                                    |
| 1426576_at   | 208449  | Sgms1      | 0.004                | 0.399 | 0.002                | 0.365 | Sphingomyelin synthase 1                                                                                      |
| 1439153_at   | 218215  | Rnf144b    | 0.004                | 0.400 | 0.001                | 0.324 | Ring finger protein 144B                                                                                      |
| 1449079_s_at | 54613   | St3gal6    | 0.003                | 0.400 | 0.002                | 0.377 | ST3 beta-galactoside alpha-2,3-sialyltransferase 6                                                            |
| 1420903_at   | 20447   | St6galnac3 | 0.005                | 0.401 | 0.001                | 0.344 | ST6 (alpha-N-acetyl-neuraminyl-2,3-beta-galactosyl-1,3)-N-acetylgalactosaminide alpha-2,6-sialyltransferase 3 |
| 1417649_at   | 12577   | Cdkn1c     | 0.008                | 0.401 | 0.002                | 0.364 | Cyclin-dependent kinase inhibitor 1C (P57)                                                                    |
| 1420696_at   | 20348   | Sema3c     | 0.002                | 0.403 | 0.001                | 0.353 | Semaphorin 3C                                                                                                 |
| 1421471_at   | 18166   | Npy1r      | 0.000                | 0.403 | 0.001                | 0.437 | Neuropeptide Y receptor Y1                                                                                    |
| 1423405_at   | 110595  | Timp4      | 0.004                | 0.403 | 0.004                | 0.449 | Tissue inhibitor of metalloproteinase 4                                                                       |
| 1426047_a_at | 19279   | Ptpr       | 0.001                | 0.404 | 0.001                | 0.425 | Protein tyrosine phosphatase, receptor type, R                                                                |
| 1439172_at   | 268878  | Atp13a5    | 0.001                | 0.404 | 0.000                | 0.245 | ATPase type 13A5                                                                                              |
| 1454622_at   | 209837  | Slc38a5    | 0.003                | 0.405 | 0.001                | 0.272 | Solute carrier family 38, member 5                                                                            |
| 1416211_a_at | 19242   | Ptn        | 0.001                | 0.405 | 0.001                | 0.346 | Pleiotrophin                                                                                                  |
| 1423608_at   | 16431   | Itm2a      | 0.004                | 0.405 | 0.003                | 0.383 | Integral membrane protein 2A                                                                                  |
| 1436611_at   | 277468  | Slc39a12   | 0.005                | 0.407 | 0.004                | 0.459 | Solute carrier family 39 (zinc transporter), member 12                                                        |
| 1434735_at   | 217082  | Hlf        | 0.001                | 0.407 | 0.000                | 0.392 | Hepatic leukemia factor                                                                                       |
| 1436600_at   | 244579  | Tox3       | 0.000                | 0.409 | 0.001                | 0.420 | TOX high-mobility-group box family member 3                                                                   |
| 1420772_a_at | 14605   | Tsc22d3    | 0.004                | 0.410 | 0.002                | 0.428 | TSC22 domain family, member 3                                                                                 |
| 1436791_at   | 22418   | Wnt5a      | 0.005                | 0.410 | 0.003                | 0.304 | Wingless-related MMTV integration site 5A                                                                     |
| 1450977_s_at | 17988   | Ndrp1      | 0.001                | 0.415 | 0.002                | 0.442 | N-myc downstream-regulated gene 1                                                                             |
| 1435292_at   | 210789  | Tbc1d4     | 0.010                | 0.416 | 0.006                | 0.384 | TBC1 domain family, member 4                                                                                  |
| 1447854_s_at | 319190  | Hist2h2be  | 0.004                | 0.416 | 0.001                | 0.440 | Histone cluster 2, H2be                                                                                       |
| 1449277_at   | 24047   | Ccl19      | 0.004                | 0.417 | 0.004                | 0.342 | Chemokine (C-C motif) ligand 19                                                                               |
| 1416635_at   | 57319   | Smpd13a    | 0.000                | 0.418 | 0.000                | 0.394 | Sphingomyelin phosphodiesterase, acid-like 3A                                                                 |
| 1448181_at   | 66277   | Klf15      | 0.003                | 0.423 | 0.003                | 0.435 | Kruppel-like factor 15                                                                                        |
| 1435026_at   | 94214   | Spock2     | 0.001                | 0.423 | 0.000                | 0.383 | Sparc/osteonectin, cwcv and kazal-like domains proteoglycan 2                                                 |
| 1448945_at   | 67801   | Pllp       | 0.002                | 0.424 | 0.000                | 0.410 | Plasma membrane proteolipid                                                                                   |
| 1415996_at   | 56338   | Txnip      | 0.002                | 0.431 | 0.001                | 0.391 | Thioredoxin-interacting protein                                                                               |
| 1451751_at   | 73284   | Ddit4l     | 0.003                | 0.433 | 0.001                | 0.430 | DNA-damage-inducible transcript 4-like                                                                        |
| 1448143_at   | 11669   | Aldh2      | 0.008                | 0.433 | 0.002                | 0.342 | Aldehyde dehydrogenase 2, mitochondrial                                                                       |
| 1429830_a_at | 12509   | Cd59a      | 0.002                | 0.434 | 0.002                | 0.385 | CD59a antigen                                                                                                 |
| 1450783_at   | 15957   | Ifit1      | 0.008                | 0.434 | 0.004                | 0.468 | Interferon-induced protein with tetratricopeptide repeats 1                                                   |
| 1456424_s_at | 18830   | Pltp       | 0.001                | 0.438 | 0.001                | 0.453 | Phospholipid transfer protein                                                                                 |

(continued)

SUPPLEMENTARY TABLE 1. (CONTINUED)

| Probe_ID     | Gene ID | Symbol    | <i>Ipsi vs. Norm</i> |       | <i>Ipsi vs. Cont</i> |       | Description                                                 |
|--------------|---------|-----------|----------------------|-------|----------------------|-------|-------------------------------------------------------------|
|              |         |           | p value              | Fold  | p value              | Fold  |                                                             |
| 1424534_at   | 75104   | Mmd2      | 0.001                | 0.439 | 0.002                | 0.483 | Monocyte to macrophage differentiation-associated 2         |
| 1429308_at   | 70673   | Prdm16    | 0.008                | 0.439 | 0.001                | 0.392 | PR domain-containing 16                                     |
| 1436665_a_at | 108075  | Ltbp4     | 0.007                | 0.440 | 0.001                | 0.445 | Latent transforming growth factor beta-binding protein 4    |
| 1424549_at   | 70059   | Degs2     | 0.005                | 0.440 | 0.001                | 0.294 | Degenerative spermatocyte homolog 2, lipid desaturase       |
| 1433600_at   | 11551   | Adra2a    | 0.002                | 0.441 | 0.004                | 0.456 | Adrenergic receptor, alpha 2a                               |
| 1427052_at   | 100705  | Acacb     | 0.005                | 0.442 | 0.002                | 0.387 | Acetyl-coenzyme A carboxylase beta                          |
| 1455044_at   | 224090  | Tmem44    | 0.000                | 0.442 | 0.000                | 0.413 | Transmembrane protein 44                                    |
| 1419759_at   | 18671   | Abcb1a    | 0.009                | 0.442 | 0.002                | 0.353 | ATP-binding cassette, subfamily B (MDR/TAP), member 1A      |
| 1424408_at   | 225341  | Lims2     | 0.002                | 0.448 | 0.002                | 0.411 | LIM and senescent cell antigen-like domains 2               |
| 1440312_at   | 74559   | Elov17    | 0.007                | 0.449 | 0.001                | 0.448 | ELOVL family member 7, elongation of long-chain fatty acids |
| 1460459_at   | 74090   | Paqr5     | 0.006                | 0.451 | 0.003                | 0.367 | Progesterin and adipoQ receptor family member V             |
| 1435417_at   | 329828  | AI464131  | 0.001                | 0.452 | 0.000                | 0.413 | Expressed sequence AI464131                                 |
| 1428573_at   | 69993   | Chn2      | 0.000                | 0.452 | 0.000                | 0.474 | Chimerin (chimaerin) 2                                      |
| 1455717_s_at | 76441   | Daam2     | 0.002                | 0.453 | 0.002                | 0.433 | Disheveled associated activator of morphogenesis 2          |
| 1426082_a_at | 229699  | Slc16a4   | 0.009                | 0.456 | 0.000                | 0.342 | Solute carrier family 16, member 4                          |
| 1418445_at   | 20502   | Slc16a2   | 0.006                | 0.458 | 0.000                | 0.396 | Solute carrier family 16, member 2                          |
| 1436596_at   | 77605   | H2afv     | 0.006                | 0.460 | 0.002                | 0.483 | H2A histone family, member V                                |
| 1422529_s_at | 12373   | Casq2     | 0.003                | 0.463 | 0.002                | 0.420 | Calsequestrin 2                                             |
| 1418365_at   | 13036   | Ctsh      | 0.009                | 0.467 | 0.002                | 0.402 | Cathepsin H                                                 |
| 1452540_a_at | 319188  | Hist1h2bp | 0.007                | 0.471 | 0.007                | 0.486 | Histone cluster 1, H2bp                                     |
| 1416111_at   | 12522   | Cd83      | 0.005                | 0.472 | 0.000                | 0.485 | CD83 antigen                                                |
| 1460239_at   | 66109   | Tspan13   | 0.000                | 0.474 | 0.000                | 0.444 | Tetraspanin 13                                              |
| 1418186_at   | 14871   | Gstt1     | 0.004                | 0.476 | 0.002                | 0.408 | Glutathione S-transferase, theta 1                          |
| 1422906_at   | 26357   | Abcg2     | 0.005                | 0.477 | 0.002                | 0.391 | ATP-binding cassette, subfamily G (WHITE), member 2         |
| 1425102_a_at | 70008   | Ace2      | 0.005                | 0.478 | 0.003                | 0.376 | Angiotensin I-converting enzyme (peptidyl-dipeptidase A) 2  |
| 1438751_at   | 226781  | Slc30a10  | 0.002                | 0.479 | 0.001                | 0.484 | Solute carrier family 30, member 10                         |
| 1452141_a_at | 20363   | Sepp1     | 0.002                | 0.479 | 0.003                | 0.485 | Selenoprotein P, plasma, 1                                  |
| 1453152_at   | 71738   | Mamdc2    | 0.005                | 0.481 | 0.002                | 0.435 | MAM domain-containing 2                                     |
| 1456616_a_at | 12215   | Bsg       | 0.001                | 0.484 | 0.001                | 0.453 | Basigin                                                     |
| 1418446_at   | 20502   | Slc16a2   | 0.002                | 0.485 | 0.000                | 0.458 | Solute carrier family 16, member 2                          |
| 1435621_at   | 330450  | Far2      | 0.005                | 0.485 | 0.000                | 0.428 | Fatty acyl-CoA reductase 2                                  |
| 1435866_s_at | 319162  | Hist3h2a  | 0.003                | 0.486 | 0.003                | 0.500 | Histone cluster 3, H2a                                      |
| 1448700_at   | 14373   | G0s2      | 0.001                | 0.489 | 0.001                | 0.457 | G <sub>0</sub> /G <sub>1</sub> switch gene 2                |
| 1434141_at   | 60596   | Gucy1a3   | 0.005                | 0.489 | 0.001                | 0.422 | Guanylate cyclase 1, soluble, alpha 3                       |
| 1428332_at   | 216505  | Pik3ip1   | 0.001                | 0.491 | 0.000                | 0.405 | Phosphoinositide-3-kinase-interacting protein 1             |
| 1449483_at   | 27015   | Polk      | 0.005                | 0.492 | 0.001                | 0.455 | Polymerase (DNA-directed), kappa                            |
| 1436425_at   | 242553  | Kank4     | 0.010                | 0.496 | 0.000                | 0.446 | KN motif and ankyrin repeat domains 4                       |
| 1426235_a_at | 14645   | Glul      | 0.001                | 0.498 | 0.001                | 0.449 | Glutamate-ammonia ligase (glutamine synthetase)             |
| 1423717_at   | 56248   | Ak3       | 0.010                | 0.498 | 0.002                | 0.426 | Adenylate kinase 3                                          |
| 1438533_at   | 17925   | Myo9b     | 0.010                | 2.014 | 0.000                | 2.008 | Myosin IXb                                                  |
| 1459357_at   | 269116  | Nfasc     | 0.007                | 2.052 | 0.000                | 2.015 | Neurofascin                                                 |
| 1443554_at   | 72475   | Ssbp3     | 0.003                | 2.071 | 0.001                | 2.175 | Single-stranded DNA-binding protein 3                       |
| 1442467_at   | 78286   | Nav2      | 0.002                | 2.109 | 0.002                | 2.004 | Neuron navigator 2                                          |
| 1434887_at   | 14299   | Freq      | 0.005                | 2.116 | 0.005                | 2.204 | Frequenin homolog ( <i>Drosophila</i> )                     |
| 1443657_at   | 229474  | Fhdcl     | 0.002                | 2.128 | 0.002                | 2.364 | FH2 domain-containing 1                                     |
| 1416200_at   | 77125   | Il33      | 0.006                | 2.139 | 0.005                | 2.455 | Interleukin-33                                              |
| 1417262_at   | 19225   | Ptgs2     | 0.005                | 2.141 | 0.000                | 2.782 | Prostaglandin-endoperoxide synthase 2                       |
| 1447930_at   | 217578  | Baz1a     | 0.000                | 2.146 | 0.001                | 2.231 | Bromodomain adjacent to zinc finger domain 1A               |

(continued)

SUPPLEMENTARY TABLE 1. (CONTINUED)

| Probe_ID     | Gene ID | Symbol        | <i>Ipsi vs. Norm</i> |       | <i>Ipsi vs. Cont</i> |       | Description                                                                                                    |
|--------------|---------|---------------|----------------------|-------|----------------------|-------|----------------------------------------------------------------------------------------------------------------|
|              |         |               | p value              | Fold  | p value              | Fold  |                                                                                                                |
| 1444317_at   | 11994   | Pcdh15        | 0.001                | 2.190 | 0.005                | 2.124 | Protocadherin 15                                                                                               |
| 1435175_at   | 207792  | BC034090      | 0.000                | 2.202 | 0.000                | 2.129 | cDNA sequence BC034090                                                                                         |
| 1427364_a_at | 18263   | Odc1          | 0.002                | 2.209 | 0.003                | 2.065 | Ornithine decarboxylase, structural 1                                                                          |
| 1428485_at   | 76459   | Car12         | 0.002                | 2.233 | 0.005                | 2.495 | Carbonic anhydrase 12                                                                                          |
| 1436484_at   | 320116  | C030019I05Rik | 0.002                | 2.259 | 0.003                | 2.088 | RIKEN cDNA C030019I05 gene                                                                                     |
| 1456274_at   | 399569  | C230071H18Rik | 0.000                | 2.278 | 0.000                | 2.449 | RIKEN cDNA C230071H18 gene                                                                                     |
| 1441668_at   | 320006  | E130107B13Rik | 0.001                | 2.320 | 0.001                | 2.111 | RIKEN cDNA E130107B13 gene                                                                                     |
| 1457268_at   | 208266  | Dot1l         | 0.001                | 2.324 | 0.000                | 2.120 | DOT1-like, histone H3 methyltransferase ( <i>S. cerevisiae</i> )                                               |
| 1456816_at   | 328365  | Zmiz1         | 0.002                | 2.337 | 0.001                | 2.310 | Zinc finger, MIZ-type-containing 1                                                                             |
| 1451780_at   | 17060   | Blnk          | 0.004                | 2.337 | 0.006                | 2.242 | B-cell linker                                                                                                  |
| 1422586_at   | 13599   | Ecel1         | 0.000                | 2.343 | 0.004                | 2.068 | Endothelin-converting enzyme-like 1                                                                            |
| 1442643_at   | 216850  | Jmjd3         | 0.002                | 2.375 | 0.002                | 2.341 | Jumonji domain-containing 3                                                                                    |
| 1438624_x_at | 195646  | Hs3st2        | 0.001                | 2.376 | 0.003                | 2.713 | Heparan sulfate (glucosamine) 3-O-sulfotransferase 2                                                           |
| 1453391_at   | 75858   | Speer7-ps1    | 0.006                | 2.401 | 0.009                | 2.274 | Spermatogenesis associated glutamate (E)-rich protein 7, pseudogene 1                                          |
| 1419254_at   | 17768   | Mthfd2        | 0.003                | 2.431 | 0.005                | 2.014 | Methylenetetrahydrofolate dehydrogenase (NAD <sup>+</sup> -dependent), methenyltetrahydrofolate cyclohydrolase |
| 1436319_at   | 240725  | Sulf1         | 0.000                | 2.451 | 0.001                | 2.383 | Sulfatase 1                                                                                                    |
| 1422706_at   | 65112   | Pmepa1        | 0.001                | 2.486 | 0.002                | 2.027 | Prostate transmembrane protein, androgen induced 1                                                             |
| 1442326_at   | 11994   | Pcdh15        | 0.004                | 2.492 | 0.008                | 2.205 | Protocadherin 15                                                                                               |
| 1429460_at   | 78249   | Gpr115        | 0.001                | 2.498 | 0.003                | 2.277 | G-protein-coupled receptor 115                                                                                 |
| 1441353_at   | 78286   | Nav2          | 0.001                | 2.569 | 0.002                | 2.385 | Neuron navigator 2                                                                                             |
| 1420697_at   | 65221   | Slc15a3       | 0.000                | 2.576 | 0.001                | 2.120 | Solute carrier family 15, member 3                                                                             |
| 1438934_x_at | 20351   | Sema4a        | 0.001                | 2.613 | 0.004                | 2.447 | Semaphorin 4A                                                                                                  |
| 1448110_at   | 20351   | Sema4a        | 0.001                | 2.628 | 0.009                | 2.058 | Semaphorin 4A                                                                                                  |
| 1439434_x_at | 230863  | Sh2d5         | 0.002                | 2.637 | 0.000                | 2.286 | SH2 domain-containing 5                                                                                        |
| 1424942_a_at | 17869   | Myc           | 0.001                | 2.656 | 0.002                | 2.488 | Myelocytomatosis oncogene                                                                                      |
| 1441187_at   | 319775  | E330037M01Rik | 0.005                | 2.663 | 0.005                | 2.637 | RIKEN cDNA E330037M01 gene                                                                                     |
| 1428781_at   | 73712   | Dmkn          | 0.000                | 2.688 | 0.009                | 2.696 | Dermokine                                                                                                      |
| 1436448_a_at | 19224   | Ptgs1         | 0.000                | 2.690 | 0.004                | 2.094 | Prostaglandin-endoperoxide synthase 1                                                                          |
| 1429549_at   | 373864  | Col27a1       | 0.000                | 2.712 | 0.000                | 2.576 | Collagen, type XXVII, alpha 1                                                                                  |
| 1429549_at   | 373864  | Col27a1       | 0.000                | 2.712 | 0.000                | 2.576 | Collagen, type XXVII, alpha 1                                                                                  |
| 1455257_at   | 16416   | Itgb3         | 0.001                | 2.714 | 0.001                | 2.385 | Integrin beta 3                                                                                                |
| 1455257_at   | 16416   | Itgb3         | 0.001                | 2.714 | 0.001                | 2.385 | Integrin beta 3                                                                                                |
| 1416303_at   | 56722   | Litaf         | 0.008                | 2.732 | 0.001                | 2.301 | LPS-induced TN factor                                                                                          |
| 1459961_a_at | 20848   | Stat3         | 0.005                | 2.740 | 0.005                | 2.626 | Signal transducer and activator of transcription 3                                                             |
| 1442845_at   | 320395  | C130075A20Rik | 0.000                | 2.740 | 0.000                | 2.418 | RIKEN cDNA C130075A20 gene                                                                                     |
| 1431043_at   | 72330   | Kbtbd5        | 0.001                | 2.741 | 0.004                | 2.006 | Kelch repeat and BTB (POZ) domain-containing 5                                                                 |
| 1420380_at   | 20296   | Ccl2          | 0.000                | 2.799 | 0.000                | 2.523 | Chemokine (C-C motif) ligand 2                                                                                 |
| 1423414_at   | 19224   | Ptgs1         | 0.000                | 2.833 | 0.001                | 2.362 | Prostaglandin-endoperoxide synthase 1                                                                          |
| 1417595_at   | 17285   | Meox1         | 0.000                | 2.864 | 0.001                | 2.216 | Mesenchyme homeobox 1                                                                                          |
| 1458015_at   | 214058  | Megf11        | 0.000                | 2.870 | 0.002                | 2.388 | Multiple EGF-like-domains 11                                                                                   |
| 1449773_s_at | 17873   | Gadd45b       | 0.000                | 2.871 | 0.000                | 2.643 | Growth arrest and DNA-damage-inducible 45 beta                                                                 |
| 1452352_at   | 13025   | Ctla2b        | 0.005                | 2.896 | 0.006                | 2.533 | Cytotoxic T-lymphocyte-associated protein 2 beta                                                               |
| 1431947_at   | 16835   | Ldlr          | 0.001                | 2.910 | 0.003                | 2.020 | Low-density lipoprotein receptor                                                                               |
| 1448593_at   | 22402   | Wisp1         | 0.000                | 2.956 | 0.001                | 3.044 | WNT1-inducible-signaling pathway protein 1                                                                     |
| 1450448_at   | 20855   | Stc1          | 0.002                | 2.960 | 0.002                | 3.097 | Stanniocalcin 1                                                                                                |
| 1419599_s_at | 68774   | Ms4a6d        | 0.001                | 3.055 | 0.004                | 2.126 | Membrane-spanning 4-domains, subfamily A, member 6D                                                            |
| 1418571_at   | 27279   | Tnfrsf12a     | 0.000                | 3.061 | 0.001                | 2.672 | Tumor necrosis factor receptor superfamily, member 12a                                                         |

(continued)

SUPPLEMENTARY TABLE 1. (CONTINUED)

| Probe_ID     | Gene ID | Symbol    | <i>Ipsi vs. Norm</i> |       | <i>Ipsi vs. Cont</i> |       | Description                                                                                   |
|--------------|---------|-----------|----------------------|-------|----------------------|-------|-----------------------------------------------------------------------------------------------|
|              |         |           | p value              | Fold  | p value              | Fold  |                                                                                               |
| 1441823_at   | 328365  | Zmiz1     | 0.001                | 3.087 | 0.001                | 3.143 | Zinc finger, MIZ-type-containing 1                                                            |
| 1459403_at   | 16835   | Ldlr      | 0.002                | 3.109 | 0.003                | 2.046 | Low-density lipoprotein receptor                                                              |
| 1455965_at   | 240913  | Adamts4   | 0.002                | 3.132 | 0.003                | 3.209 | A disintegrin-like and metallopeptidase (reprolysin type) with Thrombospondin type 1 motif, 4 |
| 1416576_at   | 12702   | Socs3     | 0.010                | 3.262 | 0.001                | 2.585 | Suppressor of cytokine-signaling 3                                                            |
| 1418572_x_at | 27279   | Tnfrsf12a | 0.000                | 3.292 | 0.000                | 2.770 | Tumor necrosis factor receptor superfamily, member 12a                                        |
| 1438761_a_at | 666231  | EG666231  | 0.000                | 3.326 | 0.000                | 3.067 | Predicted gene, EG666231                                                                      |
| 1452595_at   | 240913  | Adamts4   | 0.000                | 3.330 | 0.001                | 3.292 | A disintegrin-like and metallopeptidase (reprolysin type) with thrombospondin type 1 motif, 4 |
| 1437463_x_at | 21810   | Tgfb1     | 0.001                | 3.380 | 0.005                | 2.392 | Transforming growth factor, beta induced                                                      |
| 1452521_a_at | 18793   | Plaur     | 0.001                | 3.441 | 0.001                | 3.143 | Plasminogen activator, urokinase receptor                                                     |
| 1443387_at   | 99440   | BB045044  | 0.001                | 3.570 | 0.001                | 2.803 | Expressed sequence BB045044                                                                   |
| 1420720_at   | 53324   | Nptx2     | 0.000                | 3.602 | 0.004                | 3.735 | Neuronal pentraxin 2                                                                          |
| 1415943_at   | 20969   | Sdc1      | 0.000                | 3.616 | 0.001                | 2.512 | Syndecan 1                                                                                    |
| 1448232_x_at | 22146   | Tuba1c    | 0.000                | 3.664 | 0.001                | 2.425 | Tubulin, alpha 1C                                                                             |
| 1452729_at   | 68563   | Dpm3      | 0.000                | 3.670 | 0.002                | 2.533 | Dolichyl-phosphate mannosyltransferase polypeptide 3                                          |
| 1449960_at   | 53324   | Nptx2     | 0.000                | 3.677 | 0.002                | 3.413 | Neuronal pentraxin 2                                                                          |
| 1418349_at   | 15200   | Hbegf     | 0.000                | 3.696 | 0.000                | 2.828 | Heparin-binding EGF-like growth factor                                                        |
| 1418349_at   | 15200   | Hbegf     | 0.000                | 3.696 | 0.000                | 2.828 | Heparin-binding EGF-like growth factor                                                        |
| 1419703_at   | 53867   | Col5a3    | 0.000                | 3.708 | 0.000                | 2.485 | Collagen, type V, alpha 3                                                                     |
| 1415871_at   | 21810   | Tgfb1     | 0.001                | 3.721 | 0.003                | 2.259 | Transforming growth factor, beta induced                                                      |
| 1451969_s_at | 235587  | Parp3     | 0.000                | 3.748 | 0.000                | 2.231 | Poly (ADP-ribose) polymerase family, member 3                                                 |
| 1441917_s_at | 94346   | Tmem40    | 0.000                | 3.834 | 0.007                | 2.123 | Transmembrane protein 40                                                                      |
| 1420394_s_at | 14728   | Lilrb4    | 0.000                | 3.849 | 0.000                | 2.507 | Leukocyte immunoglobulin-like receptor, subfamily B, member 4                                 |
| 1426210_x_at | 235587  | Parp3     | 0.000                | 3.919 | 0.000                | 2.507 | Poly (ADP-ribose) polymerase family, member 3                                                 |
| 1437711_x_at | 18263   | Odc1      | 0.003                | 4.084 | 0.002                | 3.590 | Ornithine decarboxylase, structural 1                                                         |
| 1458308_at   | 216161  | Sbno2     | 0.000                | 4.119 | 0.000                | 3.665 | Strawberry notch homolog 2 ( <i>Drosophila</i> )                                              |
| 1418350_at   | 15200   | Hbegf     | 0.000                | 4.170 | 0.000                | 3.347 | Heparin-binding EGF-like growth factor                                                        |
| 1456212_x_at | 12702   | Socs3     | 0.004                | 4.245 | 0.002                | 3.326 | Suppressor of cytokine signaling 3                                                            |
| 1419282_at   | 20293   | Ccl12     | 0.001                | 4.246 | 0.002                | 3.143 | Chemokine (C-C motif) ligand 12                                                               |
| 1420591_at   | 80910   | Gpr84     | 0.001                | 4.296 | 0.001                | 2.563 | G-protein-coupled receptor 84                                                                 |
| 1460668_at   | 14419   | Gal       | 0.001                | 4.313 | 0.001                | 4.497 | Galanin                                                                                       |
| 1416811_s_at | 13024   | Ctla2a    | 0.000                | 4.376 | 0.001                | 2.696 | Cytotoxic T-lymphocyte-associated protein 2 alpha                                             |
| 1443721_x_at | 216161  | Sbno2     | 0.000                | 4.449 | 0.000                | 3.717 | Strawberry notch homolog 2 ( <i>Drosophila</i> )                                              |
| 1453191_at   | 373864  | Col27a1   | 0.000                | 4.485 | 0.000                | 3.570 | Collagen, type XXVII, alpha 1                                                                 |
| 1458648_at   | 107306  | AU042950  | 0.002                | 4.495 | 0.003                | 3.872 | Expressed sequence AU042950                                                                   |
| 1448123_s_at | 21810   | Tgfb1     | 0.000                | 4.563 | 0.004                | 2.549 | Transforming growth factor, beta induced                                                      |
| 1448123_s_at | 21810   | Tgfb1     | 0.000                | 4.563 | 0.004                | 2.549 | Transforming growth factor, beta induced                                                      |
| 1448562_at   | 22271   | Upp1      | 0.004                | 4.566 | 0.001                | 4.444 | Uridine phosphorylase 1                                                                       |
| 1455899_x_at | 12702   | Socs3     | 0.008                | 4.739 | 0.001                | 3.519 | Suppressor of cytokine signaling 3                                                            |
| 1416077_at   | 11535   | Adm       | 0.000                | 4.750 | 0.001                | 3.449 | Adrenomedullin                                                                                |
| 1438133_a_at | 16007   | Cyr61     | 0.000                | 4.992 | 0.001                | 4.877 | Cysteine-rich protein 61                                                                      |

(continued)

SUPPLEMENTARY TABLE 1. (CONTINUED)

| Probe_ID     | Gene ID | Symbol    | <i>Ipsi vs. Norm</i> |        | <i>Ipsi vs. Cont</i> |        | Description                                                                                         |
|--------------|---------|-----------|----------------------|--------|----------------------|--------|-----------------------------------------------------------------------------------------------------|
|              |         |           | p value              | Fold   | p value              | Fold   |                                                                                                     |
| 1439349_at   | 216161  | Sbno2     | 0.001                | 4.997  | 0.000                | 3.585  | Strawberry notch homolog 2<br>( <i>Drosophila</i> )                                                 |
| 1448471_a_at | 13024   | Ctla2a    | 0.000                | 5.010  | 0.002                | 3.151  | Cytotoxic T-lymphocyte-associated<br>protein 2 alpha                                                |
| 1421207_at   | 16878   | Lif       | 0.000                | 5.034  | 0.001                | 3.877  | Leukemia inhibitory factor                                                                          |
| 1416039_x_at | 16007   | Cyr61     | 0.000                | 5.180  | 0.001                | 5.070  | Cysteine-rich protein 61                                                                            |
| 1447839_x_at | 11535   | Adm       | 0.001                | 5.230  | 0.002                | 3.939  | Adrenomedullin                                                                                      |
| 1416529_at   | 13730   | Emp1      | 0.000                | 5.661  | 0.000                | 4.724  | Epithelial membrane protein 1                                                                       |
| 1450716_at   | 11504   | Adamts1   | 0.000                | 5.706  | 0.000                | 5.063  | A disintegrin-like and metallopeptidase<br>(reprolysin type) with<br>thrombospondin type 1 motif, 1 |
| 1437279_x_at | 20969   | Sdc1      | 0.000                | 5.782  | 0.001                | 3.461  | Syndecan 1                                                                                          |
| 1430352_at   | 101401  | Adamts9   | 0.001                | 5.938  | 0.001                | 5.032  | A disintegrin-like and metallopeptidase<br>(reprolysin type) with<br>thrombospondin type 1 motif, 9 |
| 1448831_at   | 11601   | Angpt2    | 0.000                | 6.149  | 0.000                | 3.638  | Angiopoietin 2                                                                                      |
| 1422053_at   | 16323   | Inhba     | 0.000                | 6.352  | 0.000                | 6.255  | Inhibin beta-A                                                                                      |
| 1416342_at   | 21923   | Tnc       | 0.000                | 6.410  | 0.000                | 4.880  | Tenascin C                                                                                          |
| 1421811_at   | 21825   | Thbs1     | 0.003                | 6.956  | 0.007                | 5.393  | Thrombospondin 1                                                                                    |
| 1419100_at   | 20716   | Serpina3n | 0.001                | 7.202  | 0.002                | 3.719  | Serine (or cysteine) peptidase inhibitor,<br>clade A, member 3N                                     |
| 1449982_at   | 16156   | Il11      | 0.005                | 7.922  | 0.009                | 6.404  | Interleukin-11                                                                                      |
| 1437139_at   | 14654   | Gla1      | 0.000                | 8.541  | 0.000                | 6.699  | Glycine receptor, alpha 1 subunit                                                                   |
| 1434046_at   | 433470  | AA467197  | 0.000                | 8.932  | 0.000                | 8.509  | Expressed sequence AA467197                                                                         |
| 1437785_at   | 101401  | Adamts9   | 0.000                | 10.277 | 0.000                | 6.989  | A disintegrin-like and metallopeptidase<br>(reprolysin type) with<br>Thrombospondin type 1 motif, 9 |
| 1423760_at   | 12505   | Cd44      | 0.000                | 11.354 | 0.001                | 6.850  | CD44 antigen                                                                                        |
| 1434376_at   | 12505   | Cd44      | 0.000                | 12.659 | 0.001                | 6.566  | CD44 antigen                                                                                        |
| 1418547_at   | 21789   | Tfpi2     | 0.000                | 14.926 | 0.001                | 7.600  | Tissue factor pathway inhibitor 2                                                                   |
| 1451038_at   | 30878   | Apln      | 0.000                | 14.929 | 0.001                | 11.004 | Apelin                                                                                              |
| 1460227_at   | 21857   | Timp1     | 0.000                | 15.029 | 0.001                | 5.495  | Tissue inhibitor of metalloproteinase 1                                                             |
| 1416431_at   | 67951   | Tubb6     | 0.000                | 19.593 | 0.000                | 9.234  | Tubulin, beta 6                                                                                     |
| 1419149_at   | 18787   | Serpine1  | 0.000                | 20.866 | 0.001                | 12.025 | Serine (or cysteine) peptidase inhibitor,<br>clade E, member 1                                      |
| 1418945_at   | 17392   | Mmp3      | 0.000                | 25.457 | 0.000                | 15.573 | Matrix metallopeptidase 3                                                                           |
| 1418666_at   | 19288   | Ptx3      | 0.000                | 34.404 | 0.001                | 7.042  | Pentraxin-related gene                                                                              |

cDNA, complementary DNA; ATP, adenosine triphosphate; GTP, guanosine triphosphate; CoA, coenzyme A; NAD<sup>+</sup>, nicotinamide adenine dinucleotide; LPS, lipopolysaccharide; TN, tumor necrosis; EGF, epidermal growth factor.
